# Supplementary material
Source: PubMed Central journal article supplement (PMC5543913)
Supplement: jciinsight-2-91588-s009.pdf [file jciinsight-2-91588-s009.pdf]

## SUPPLEMENTAL FIGURE LEGENDS

Supplemental Figure 1. *Fbn1*<sup>C1039G/+</sup> hearts display normal cardiac function in the absence of hemodynamic stress. A. Echocardiographic quantification of cardiac dimensions and function in *Fbn1*<sup>+/+</sup> and *Fbn1*<sup>C1039G/+</sup> mice with and without valvular regurgitation at 4 and 12 months of age. EDD, end-diastolic diameter; ESD, end-systolic diameter; FS, fractional shortening; LVM, left ventricular mass. n<sub>≥</sub>14 per group. \*p<0.05, \*\*, p<0.01, \*\*\*p<0.001, 2w ANOVA, Tukey's correction. B. Representative PV loop of a 12mo *Fbn1*<sup>+/+</sup> (blue line, blue fill) and *Fbn1*<sup>C1039G/+</sup> mouse (red line, red fill) without valvular regurgitation. Summary data obtained from PV loop analysis shown in bar graphs: E<sub>es</sub>, end-systolic elastance and PRSW, preload recruitable stroke work, reflect load-independent indices of ventricular contractility. Tau, relaxation time constant reflects a load-independent index of ventricular stiffness; n=3-6 per group. C. dP/dt<sub>max</sub>, peak rate of left ventricular pressure rise, an index of contractility; dP/dt<sub>min</sub>, peak rate of left ventricular pressure decline, an index of lusitropy. Invasive blood pressure measurements taken from PV loop analysis of *Fbn1*<sup>+/+</sup> and *Fbn1*<sup>C1039G/+</sup> mice without valvular regurgitation at 4 and 12 months of age. n=3-6 per group. D. Gross morphometric analysis of post-natal *Fbn1*<sup>+/+</sup>, *Fbn1*<sup>C1039G/+</sup>, *Fbn1*<sup>C1039G/C1039G</sup> mice at 8do, 6mo and 12mo age, in mice without valvular regurgitation. HW/BW, heart weight/body weight ratio; HW/TL, heart weight/tibial length ratio. n<sub>≥</sub>4 per group.

Supplemental Figure 2. *Fbn1*<sup>C1039G/+</sup> hearts have normal TGFβ signaling in the absence of hemodynamic stress. A-C. Representative Western blot and summary quantification for phosphorylated/total (p/t), p/tSmad2, p/tERK1/2, and GAPDH using left ventricular tissue lysates. n=4 per group. D. mRNA expression normalized to *18S* and then to *Fbn1*<sup>+/+</sup> data, assessed by real-time RT-PCR from left ventricular tissue of 3mo *Fbn1*<sup>+/+</sup> and

*Fbn1*<sup>C1039G/+</sup> hearts without regurgitation. *Ctgf*, connective tissue growth factor. *Serpine1*, plasminogen activator inhibitor, type 1. n>=4 per group.

Supplemental Figure 3. *Fbn1*<sup>C1039G/+</sup> hearts develop hypertrophy and fibrosis in response to pressure overload. A. Baseline echocardiographic quantification of cardiac dimensions in 5mo *Fbn1*<sup>+/+</sup> and *Fbn1*<sup>C1039G/+</sup> mice without valvular regurgitation. EDD, end-diastolic diameter; ESD, end-systolic diameter; IVST, interventricular septum thickness; PWT, posterior wall thickness. n=4-6 per group. B. Myocyte hypertrophy, as assessed by cross-sectional area (CSA) in hematoxylin-eosin staining. Summary quantification of averaged data, >20 cells per heart. n=4 per group. C. Fibrotic area, as assessed by Masson's Trichrome stain and quantified by total number of blue pixels normalized to whole tissue area and then to *Fbn1*<sup>+/+</sup>:SHAM data. n=4-6 per group. D. mRNA expression of hypertrophy genes, normalized to *Gapdh* and then to *Fbn1*<sup>+/+</sup>:SHAM data, assessed by real-time RT-PCR. n=4-6 per group. *Myh7*, myosin heavy chain 7 (βMHC), *Nppa*, natriuretic peptide A (ANP), *Nppb*, natriuretic peptide B (BNP). \*\*p<0.01, \*\*\*p<0.001, 1w ANOVA, Tukey's correction.

Supplemental Figure 4. *Fibrillin-1* protein fails to deposit in myocardium in load-induced heart failure in *Fbn1*<sup>C1039G/+</sup> mice. Additional representative images of immunofluorescent fibrillin-1 staining (red) of heart sections from *Fbn1*<sup>+/+</sup> and *Fbn1*<sup>C1039G/+</sup> mice subjected to 4w TAC. Red, fibrillin-1 (interstitial space); blue, DAPI (nuclei); Green, lipofuscin (myocytes). Top 4 panels, Scale bar: 20 μm. Bottom 4 panels, 2x zoom. White arrow head points to an example nonmyocyte cell in the interstitial space.

Supplemental Figure 5. *Smad2* and *ERK1/2* activation are differentially increased in the myocyte and nonmyocyte compartments of failing *Fbn1*<sup>C1039G/+</sup> hearts. A. Representative serial sections of pSmad2 (red, top panels) and pERK1/2 (red, bottom panels) immunostaining in *Fbn1*<sup>C1039G/+</sup>

hearts subjected to 4w TAC. Far left panels, scale bar: 50  $\mu$ m. Middle and far right panels, zoom 2x. Blue, DAPI (nuclei); Green, lipofuscin (myocytes). White arrows, myocyte nuclei. Yellow arrows, nonmyocyte nuclei. B. Summary quantification of % of total pSmad2 and pERK1/2 immunofluorescence intensity localized to nonmyocyte (NM) and myocyte (M) cells per unit area. n=10-15 areas quantified. \*p<0.05, \*\*p<0.01, Student's t-test. C. Representative myocyte-enriched serial sections. Scale bar: 50  $\mu$ m. D. Representative co-immunostaining of serial sections with vimentin (yellow) and pSmad2 (left panel) and vimentin (yellow) and pERK1/2 (right panel). Scale bar: 25  $\mu$ m. Gray, lipofuscin (myocytes).

Supplemental Figure 6. *ERK1/2 activation, but not Smad2 activation, is significantly attenuated by MEK inhibition.* Immunoblot for pSmad2, pERK1/2 and GAPDH using cultured neonatal rat cardiac fibroblasts with TGF- $\beta$ 3 (10 ng/ml) stimulation for 15 minutes with and without treatment with MEKi, RDEA119 (100nM) or PD98059 (50 $\mu$ M). n=4 per group. \*\*p<0.01, \*\*\*p<0.001, 1w ANOVA, Tukey's correction.

Supplemental Figure 7. *Myocyte hypertrophy in  $Fbn1^{C1039G/+}$  hearts is prevented with losartan and MEKi treatment.* A. Representative hematoxylin-eosin staining of formalin-fixed heart sections. White dotted line delineates myocyte diameter. Scale bars: 50 $\mu$ m. B. Myocyte hypertrophy as assessed by wheat germ agglutinin (WGA) staining. Scale bars: 25 $\mu$ m. C. Summary quantification of average cross-sectional area (CSA) data, >1000 cells per heart. n=4-7 per group. D. mRNA expression of hypertrophy genes, normalized to *Gapdh* and then to *Fbn1<sup>+/+</sup>*:SHAM data, assessed by real-time RT-PCR. *Myh7*, myosin heavy chain 7 ( $\beta$ MHC), *Myh6*, myosin heavy chain 6 ( $\alpha$ MHC), *Nppa*, natriuretic peptide A (ANP), *Nppb*, natriuretic peptide B (BNP). n=4-7 per group. \*p<0.05, \*\*p<0.01, \*\*\*p<0.001, 1w ANOVA, Tukey's correction.

Supplemental Figure 8. *Smad2* and *ERK1/2* activation are differentially increased in response to *TGFβ* and angiotensin II in cardiac fibroblasts. Immunoblot for pSmad2, pERK1/2 and GAPDH using cultured neonatal murine cardiac fibroblasts with TGFβ1 (5 ng/ml) or AngII (5nM) stimulation for 24 hours. Lanes were run on the same gel but were noncontiguous. n>=3 per group. \*\*p<0.01, 1w ANOVA, Tukey's correction.

Supplemental Figure 9. *Inhibition of ERK1/2 activation suppresses Smad2 activation in both nonmyocyte and myocyte compartments.* A-B. Labeling index (% positive cells) of pSmad2 or pERK1/2 immunofluorescence in the nonmyocyte and myocyte compartments. n>5 fields per group. C. Total number of nonmyocytes and myocytes normalized to *Fbn1*<sup>+/+</sup>:SHAM data. n=15-30 fields per group. \*p<0.05, \*\*p<0.01, \*\*\*p<0.001, 1w ANOVA, Tukey's correction.

Supplemental Figure 10. *TGFβ3 is predominantly expressed in the nonmyocyte compartment.* A-C. Representative *in situ* hybridization of *Tgfb3*. A. *Fbn1*<sup>+/+</sup>:TAC vs *Fbn1*<sup>C1039G/+</sup>:TAC, *Tgfb3*, red. Left panel, scale bar: 10μm. Right panel, zoom 2x inset. Dotted line demarcates myocyte compartment. Red arrows point to examples of *in situ* RNA hybridization (red dots) found throughout the nonmyocyte compartment. B. Myocyte- vs nonmyocyte-enriched areas. Scale bar: 10μm. C. *Tgfb3* and *Vim*. Left panel, *Tgfb3*, red, left panel and *Vim*, red, right panel. Dotted-line outlines the cardiac myocytes. Scale bar: 10μm. D. mRNA expression of *Tgfb3* and *Vim* normalized to *Gapdh* and then to myocyte data. n=4-6 per group. \*\*\*p<0.001, Student's t-test.

Supplemental Figure 11. *AngII-mediated ERK1/2 activation is differentially increased in Fbn1*<sup>C1039G/+</sup> vs WT fibroblasts. Immunoblots for pSmad2, pERK1/2 and GAPDH using cultured neonatal murine cardiac fibroblasts from *Fbn1*<sup>C1039G/+</sup> and *Fbn1*<sup>+/+</sup> hearts with AngII (5nM) or TGFβ3 (5 ng/ml) stimulation for 12 hours. Lanes were run on the same gel but were noncontiguous. n>=3 per group. \*\*\*p<0.001, 1w ANOVA, Tukey's correction.

# Supplemental Figure 1

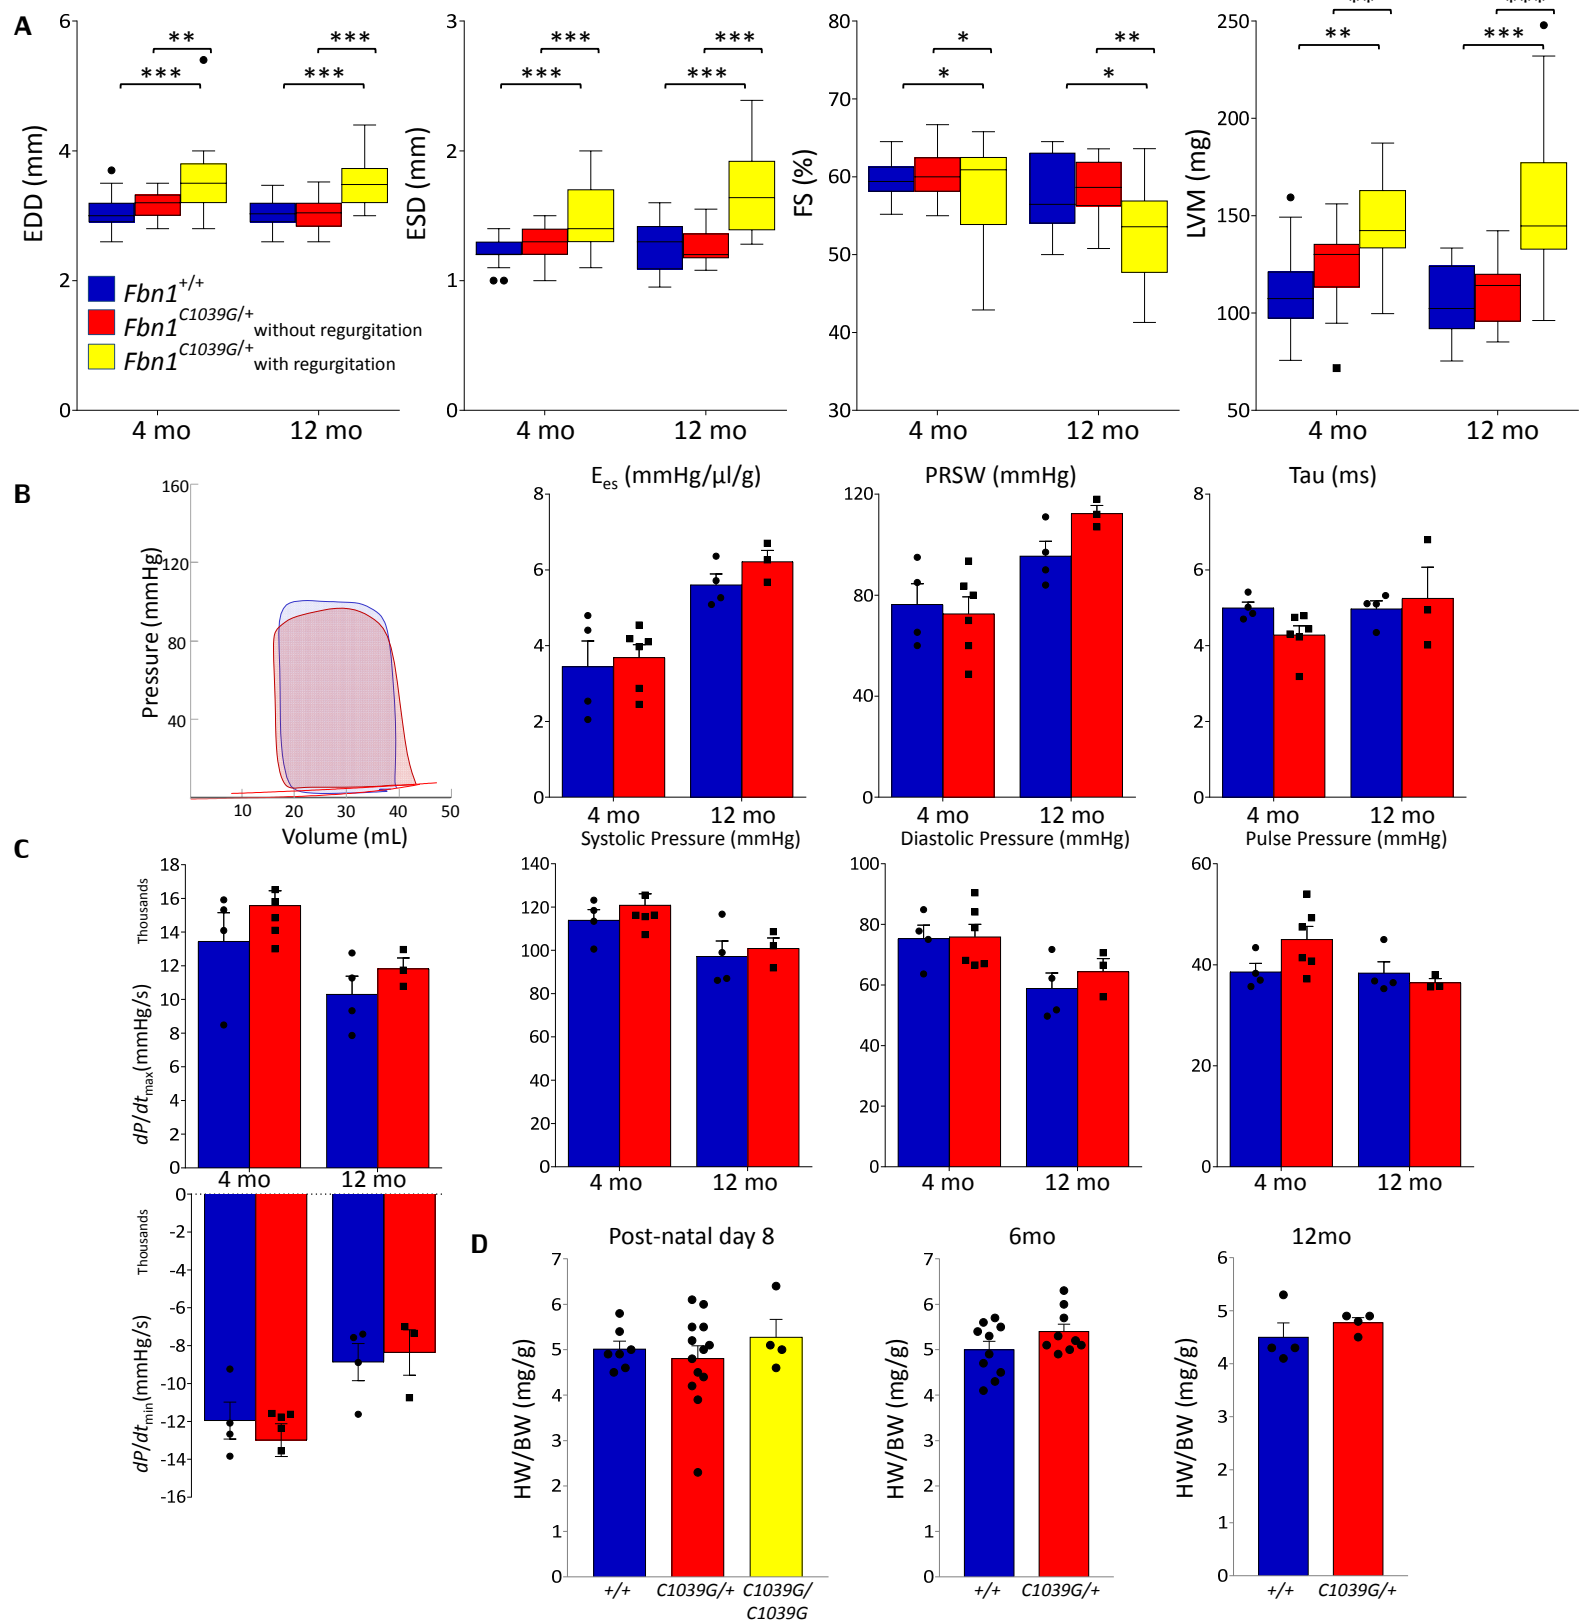

Supplemental Figure 1. *Fbn1*<sup>C1039G/+</sup> hearts display normal cardiac function in the absence of hemodynamic stress. A. Echocardiographic quantification of cardiac dimensions and function in *Fbn1*<sup>+/+</sup> and *Fbn1*<sup>C1039G/+</sup> mice with and without valvular regurgitation at 4 and 12 months of age. EDD, end-diastolic diameter; ESD, end-systolic diameter; FS, fractional shortening; LVM, left ventricular mass.  $n \geq 14$  per group. \* $p < 0.05$ , \*\* $p < 0.01$ , \*\*\* $p < 0.001$ , 2w ANOVA, Tukey's correction. B. Representative PV loop of a 12mo *Fbn1*<sup>+/+</sup> (blue line, blue fill) and *Fbn1*<sup>C1039G/+</sup> mouse (red line, red fill) without valvular regurgitation. Summary data obtained from PV loop analysis shown in bar graphs:  $E_{es}$ , end-systolic elastance and PRSW, preload recruitable stroke work, reflect load-independent indices of ventricular contractility. Tau, relaxation time constant reflects a load-independent index of ventricular stiffness;  $n = 3-6$  per group. C.  $dP/dt_{max}$ , peak rate of left ventricular pressure rise, an index of contractility;  $dP/dt_{min}$ , peak rate of left ventricular pressure decline, an index of lusitropy. Invasive blood pressure measurements taken from PV loop analysis of *Fbn1*<sup>+/+</sup> and *Fbn1*<sup>C1039G/+</sup> mice without valvular regurgitation at 4 and 12 months of age.  $n = 3-6$  per group. D. Gross morphometric analysis of post-natal *Fbn1*<sup>+/+</sup>, *Fbn1*<sup>C1039G/+</sup>, *Fbn1*<sup>C1039G/C1039G</sup> mice at 8do, 6mo and 12mo age, in mice without valvular regurgitation. HW/BW, heart weight/body weight ratio; HW/TL, heart weight/tibial length ratio.  $n \geq 4$  per group.

# Supplemental Figure 2

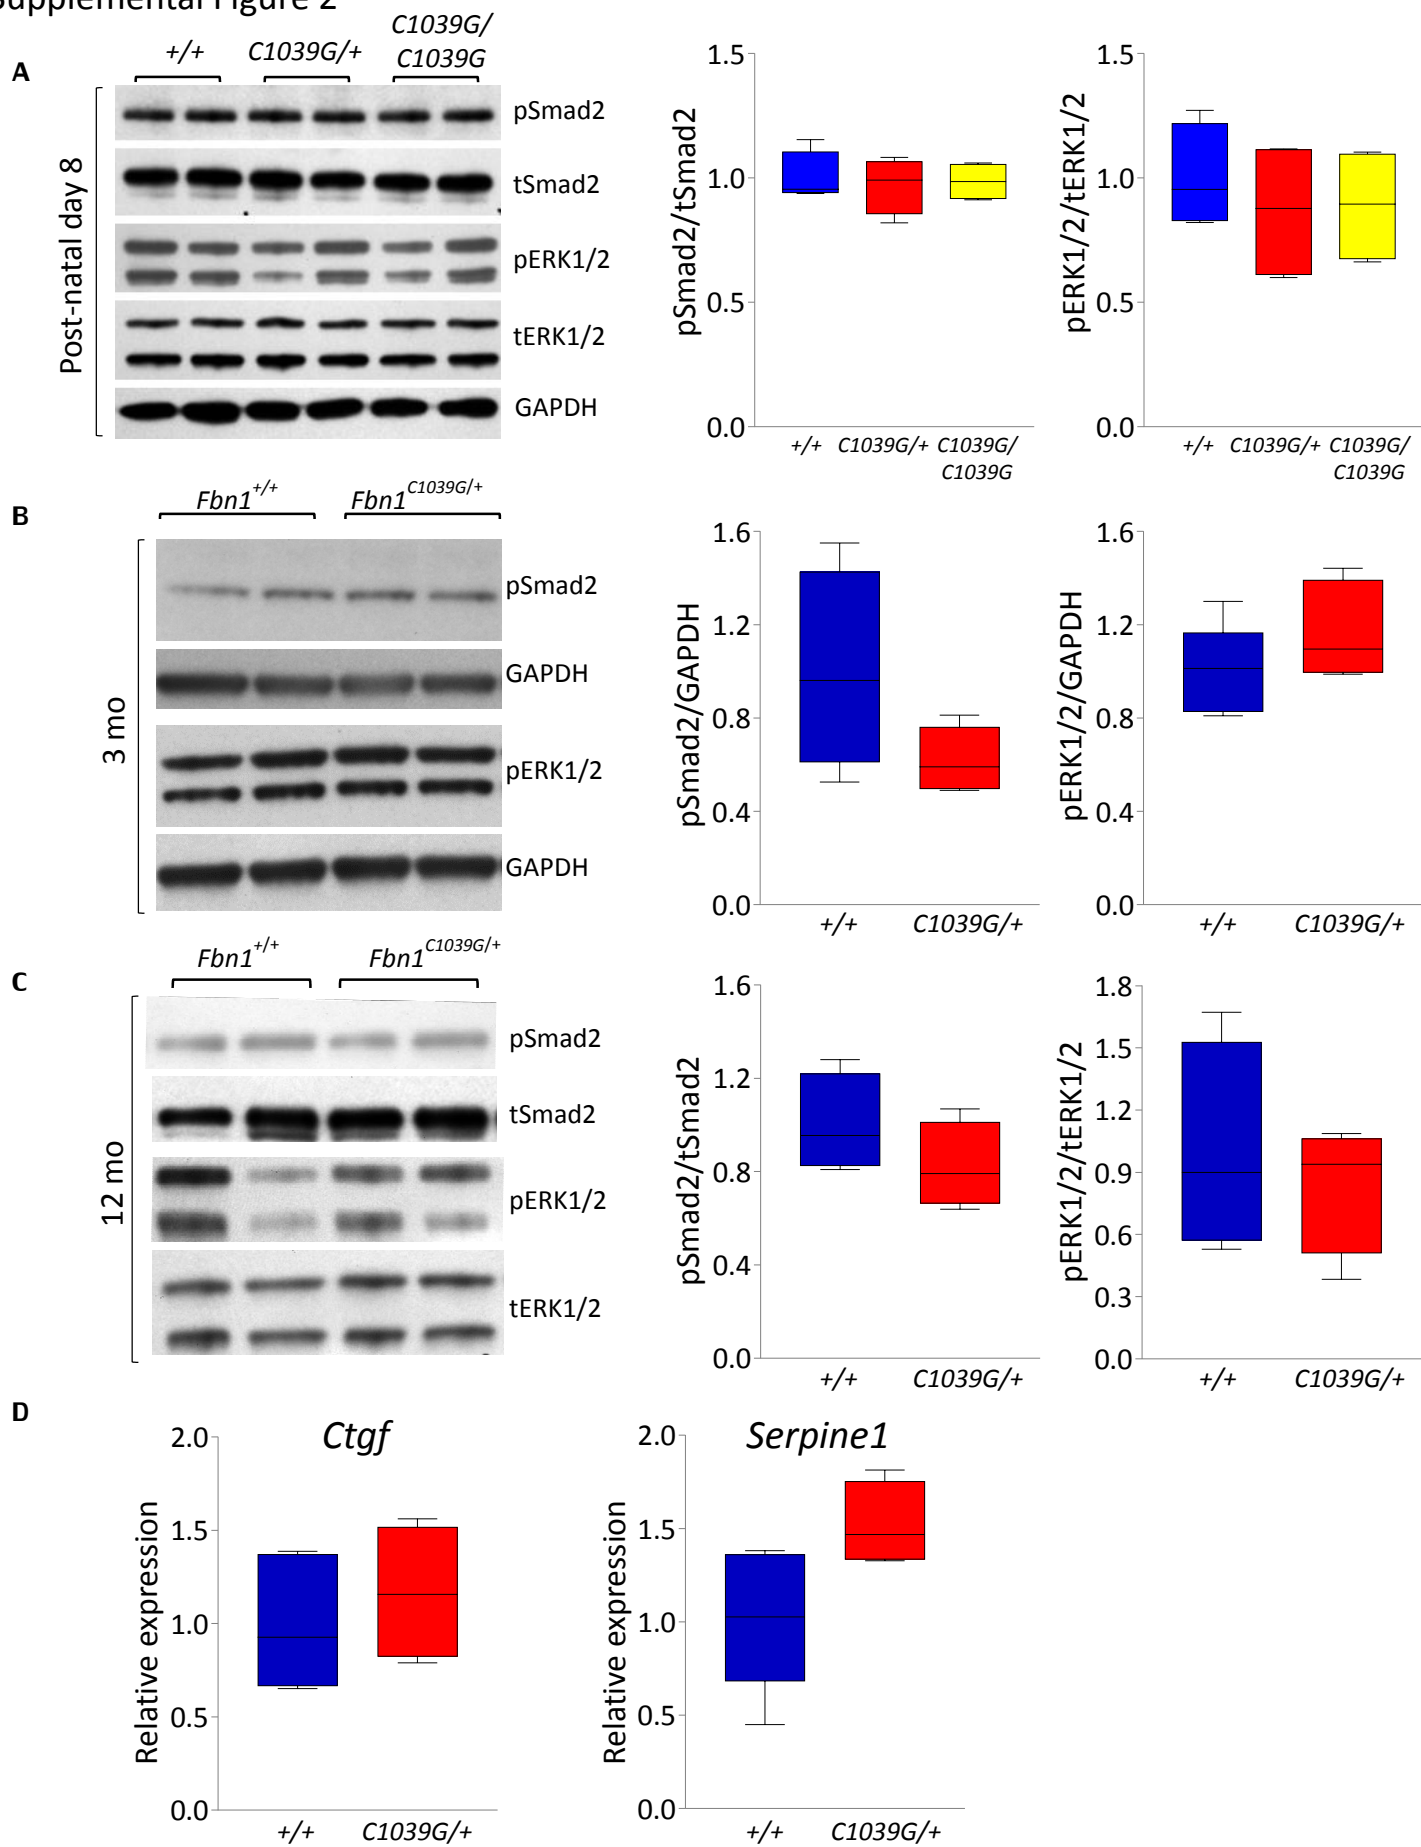

Supplemental Figure 2. *Fbn1*<sup>C1039G/+</sup> hearts have normal TGF $\beta$  signaling in the absence of hemodynamic stress. A-C. Representative Western blot and summary quantification for phosphorylated/total (p/t), p/tSmad2, p/tERK1/2, and GAPDH using left ventricular tissue lysates. n=4 per group. D. mRNA expression normalized to 18S and then to *Fbn1*<sup>+/+</sup> data, assessed by real-time RT-PCR from left ventricular tissue of 3mo *Fbn1*<sup>+/+</sup> and *Fbn1*<sup>C1039G/+</sup> hearts without regurgitation. *Ctgf*, connective tissue growth factor. *Serpine1*, plasminogen activator inhibitor, type 1. n>=4 per group.

# Supplemental Figure 3

A

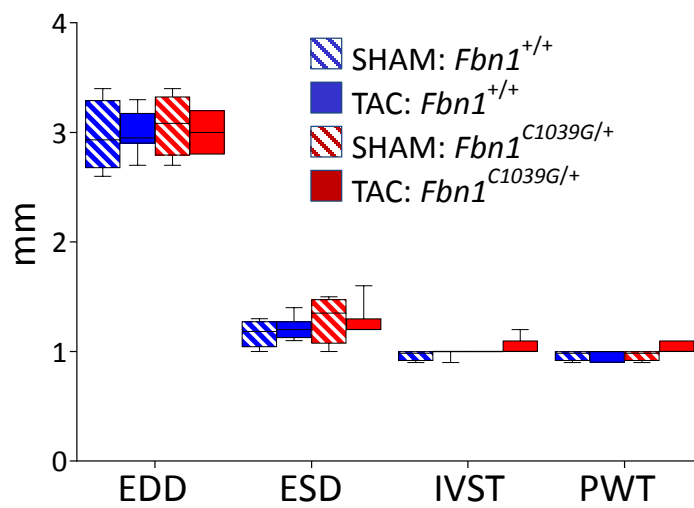

B

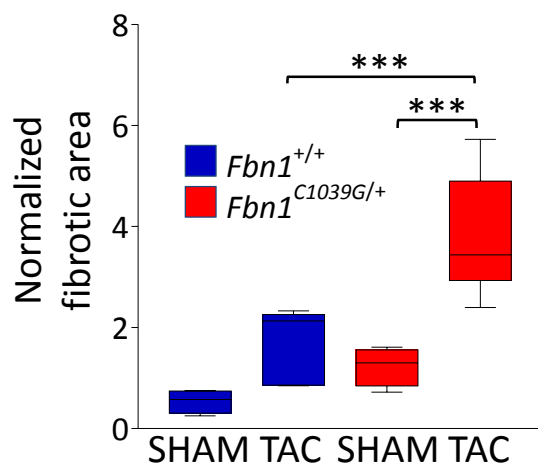

C

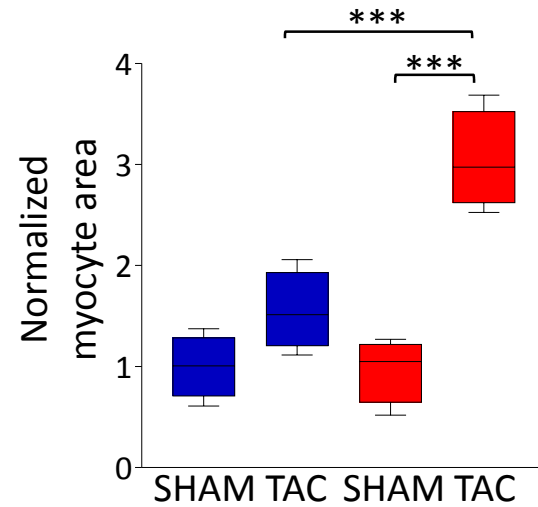

D

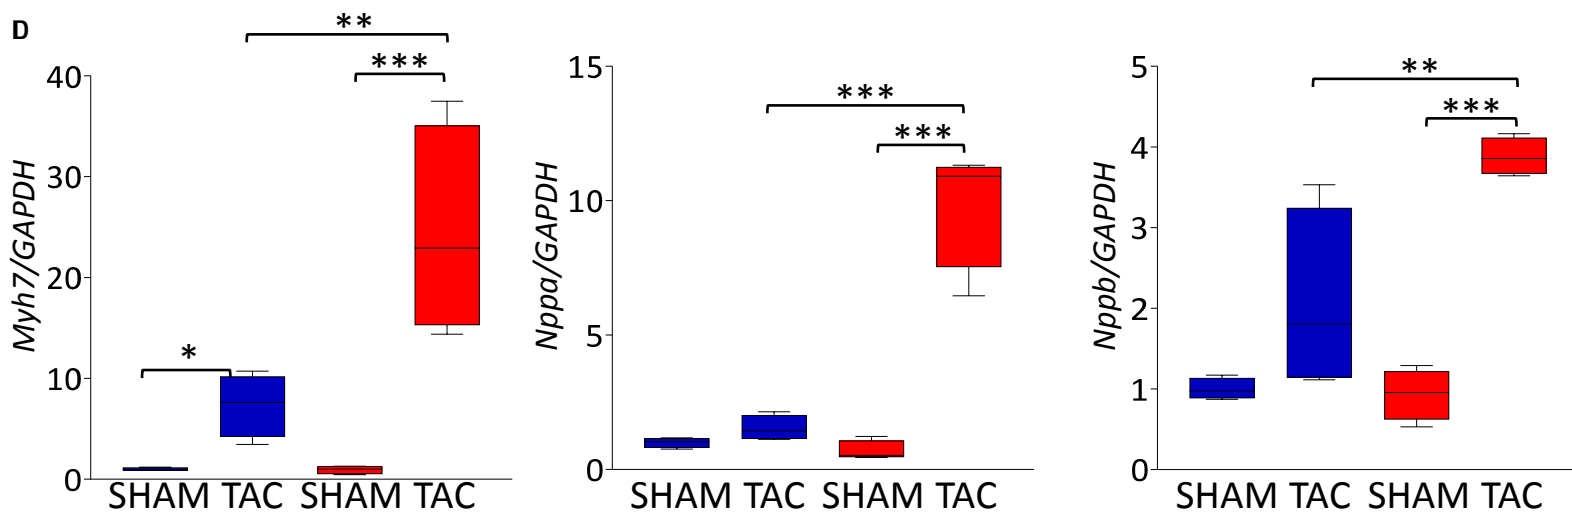

Supplemental Figure 3. *Fbn1*<sup>C1039G/+</sup> hearts develop hypertrophy and fibrosis in response to pressure overload. A. Baseline echocardiographic quantification of cardiac dimensions in 5mo *Fbn1*<sup>+/+</sup> and *Fbn1*<sup>C1039G/+</sup> mice without valvular regurgitation. EDD, end-diastolic diameter; ESD, end-systolic diameter; IVST, interventricular septum thickness; PWT, posterior wall thickness. n=4-6 per group. B. Myocyte hypertrophy, as assessed by cross-sectional area (CSA) in hematoxylin-eosin staining. Summary quantification of averaged data, >20 cells per heart. n=4 per group. C. Fibrotic area, as assessed by Masson's Trichrome stain and quantified by total number of blue pixels normalized to whole tissue area and then to *Fbn1*<sup>+/+</sup>:SHAM data. n=4-6 per group. D. mRNA expression of hypertrophy genes, normalized to *Gapdh* and then to *Fbn1*<sup>+/+</sup>:SHAM data, assessed by real-time RT-PCR. n=4-6 per group. *Myh7*, myosin heavy chain 7 ( $\beta$ MHC), *Nppa*, natriuretic peptide A (ANP), *Nppb*, natriuretic peptide B (BNP). \*\*p<0.01, \*\*\*p<0.001, 1w ANOVA, Tukey's correction.

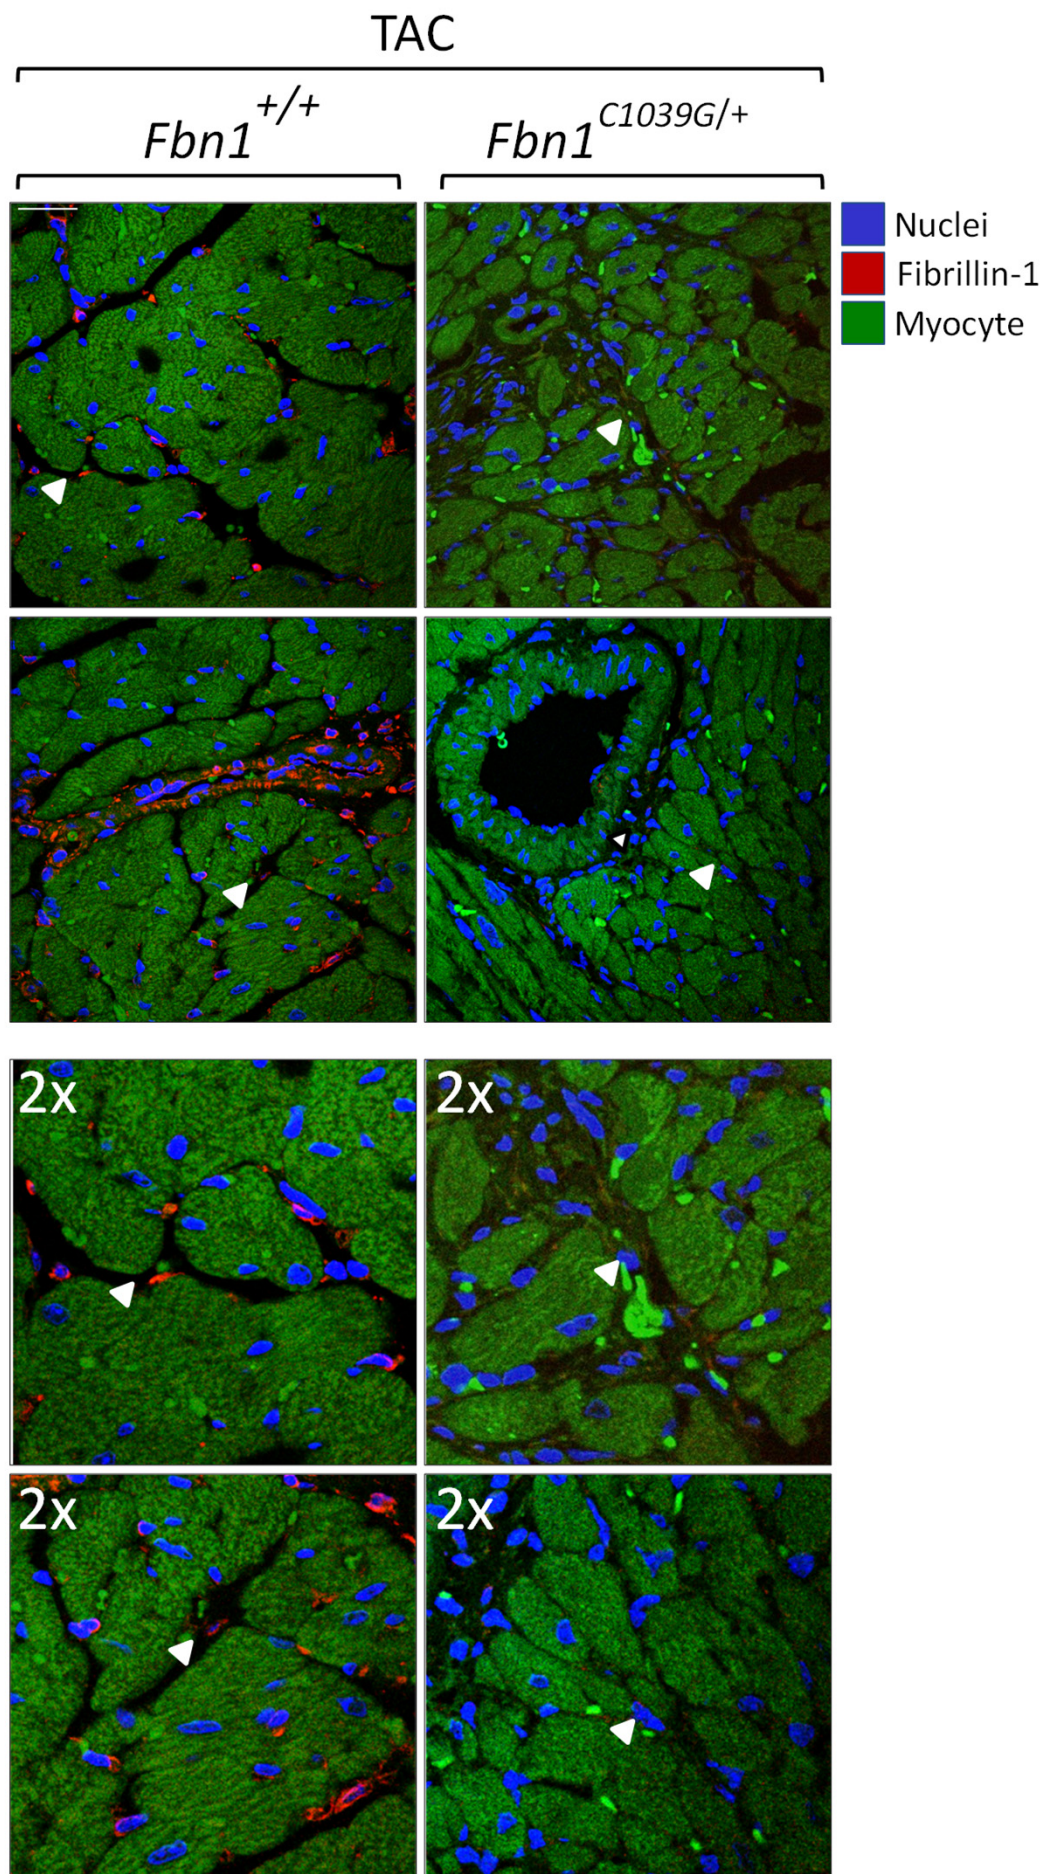

Supplemental Figure 4. *Fibrillin-1* protein fails to deposit in myocardium in load-induced heart failure in  $Fbn1^{C1039G/+}$  mice. Additional representative images of immunofluorescent fibrillin-1 staining (red) of heart sections from  $Fbn1^{+/+}$  and  $Fbn1^{C1039G/+}$  mice subjected to 4w TAC. Red, fibrillin-1 (interstitial space); blue, DAPI (nuclei); Green, lipofuscin (myocytes). Top 4 panels, Scale bar: 20  $\mu$ m. Bottom 4 panels, 2x zoom. White arrow head points to an example nonmyocyte cell in the interstitial space.



Supplemental Figure 5

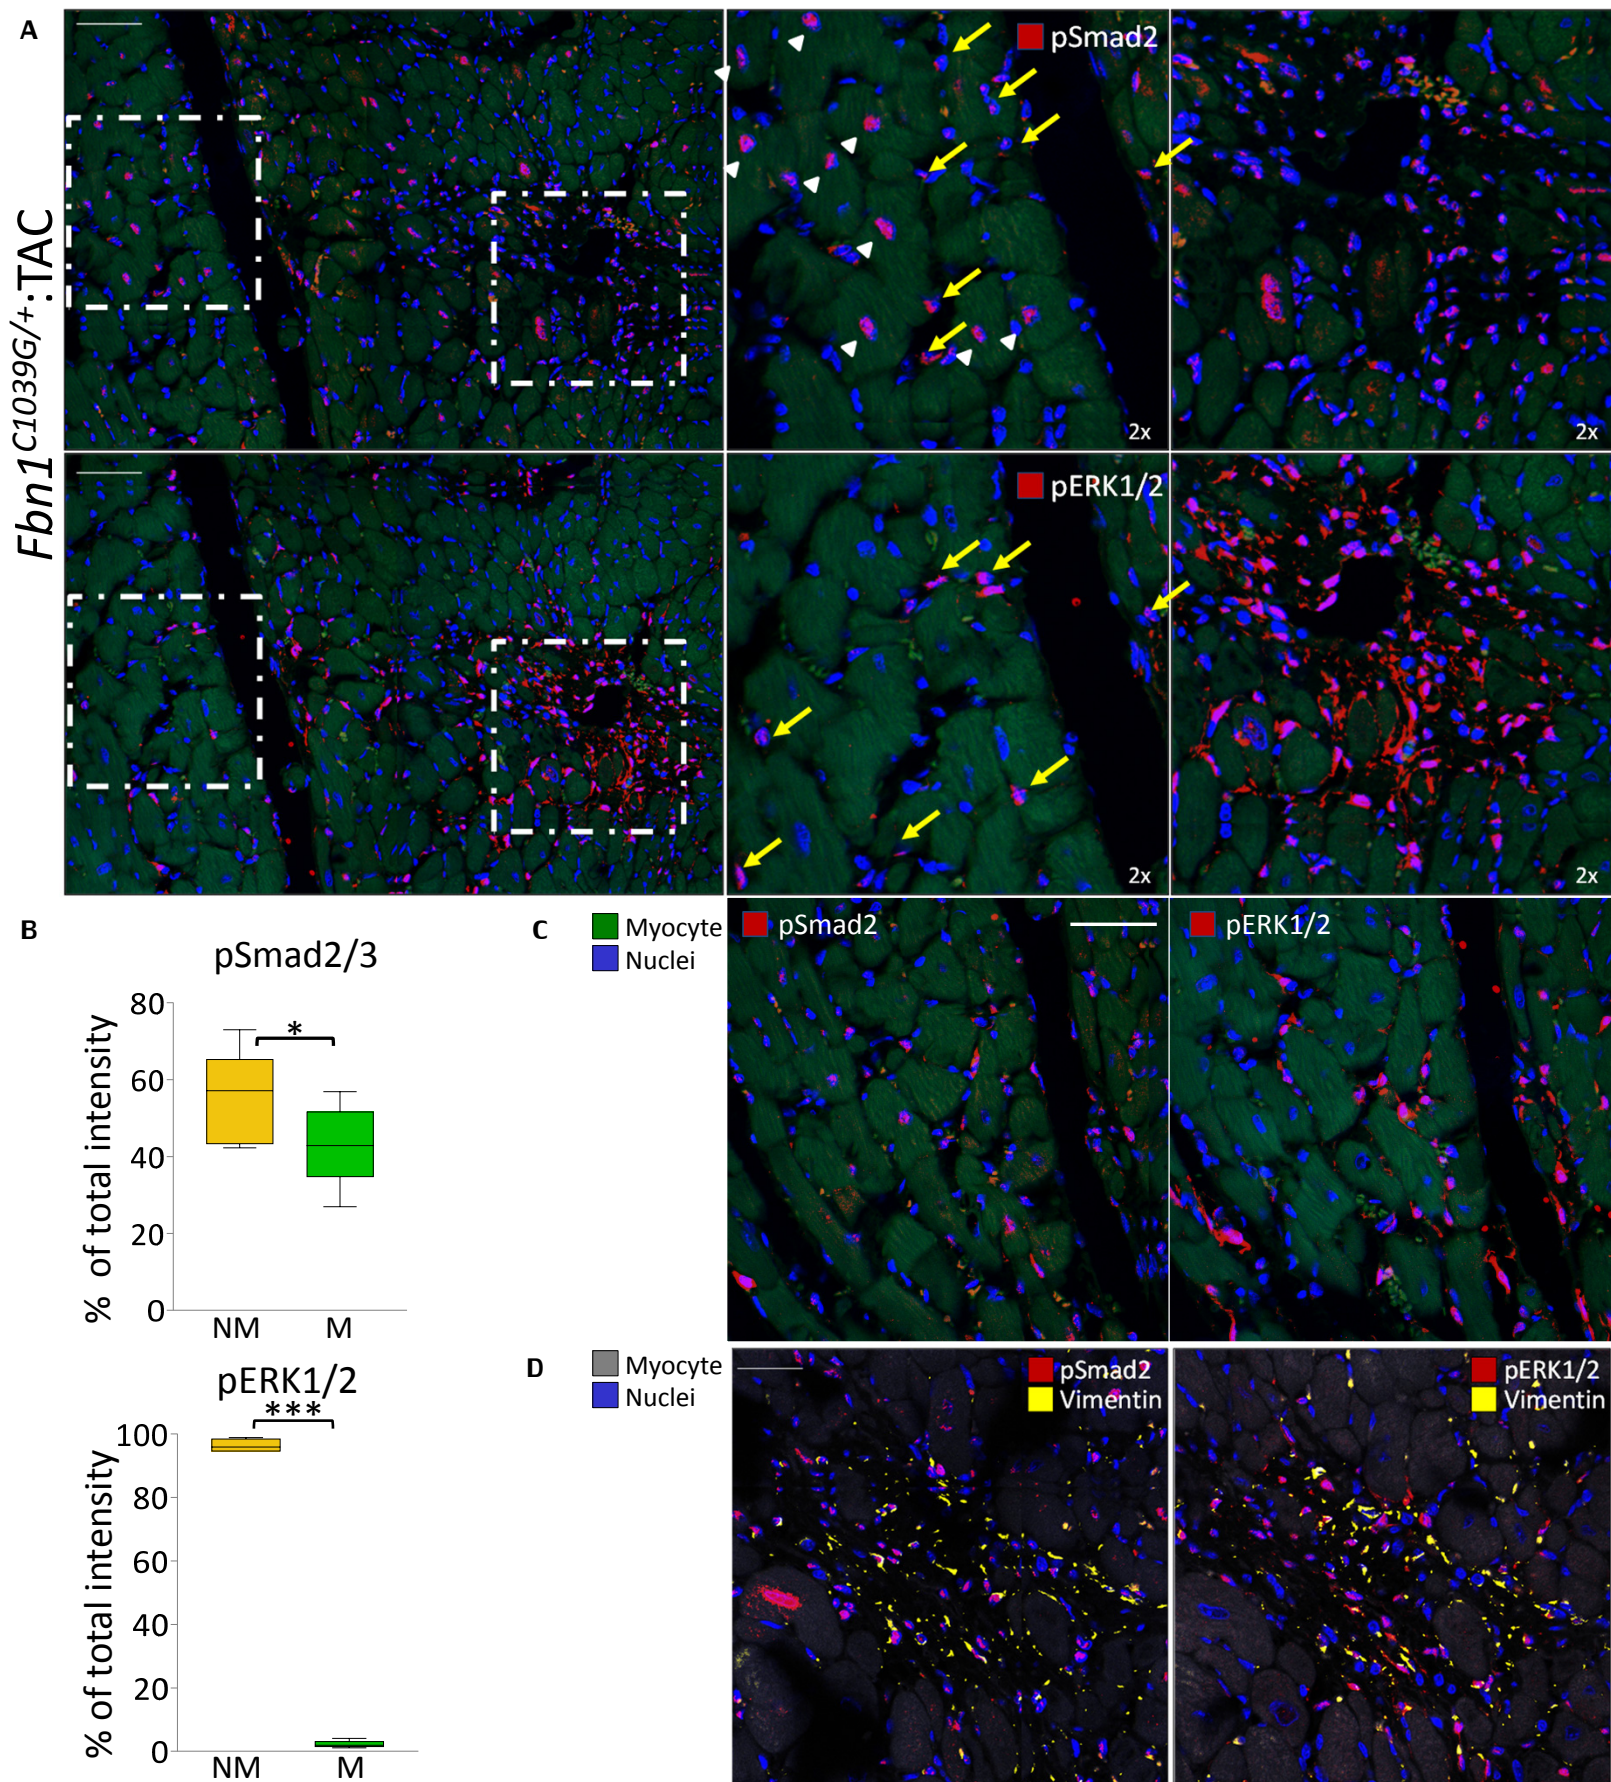

Supplemental Figure 5. *Smad2* and *ERK1/2* activation are differentially increased in the myocyte and nonmyocyte compartments of failing *Fbn1<sup>C1039G/+</sup>* hearts. A. Representative serial sections of pSmad2 (red, top panels) and pERK1/2 (red, bottom panels) immunostaining in *Fbn1<sup>C1039G/+</sup>* hearts subjected to 4w TAC. Far left panels, scale bar: 50  $\mu$ m. Middle and far right panels, zoom 2x. Blue, DAPI (nuclei); Green, lipofuscin (myocytes). White arrows, myocyte nuclei. Yellow arrows, nonmyocyte nuclei. B. Summary quantification of % of total pSmad2 and pERK1/2 immunofluorescence intensity localized to nonmyocyte (NM) and myocyte (M) cells per unit area. n=10-15 areas quantified. \* $p < 0.05$ , \*\*\* $p < 0.01$ , Student's t-test. C. Representative myocyte-enriched serial sections. Scale bar: 50  $\mu$ m. D. Representative co-immunostaining of serial sections with vimentin (yellow) and pSmad2 (left panel) and vimentin (yellow) and pERK1/2 (right panel). Scale bar: 25  $\mu$ m. Gray, lipofuscin (myocytes).

# Supplemental Figure 6

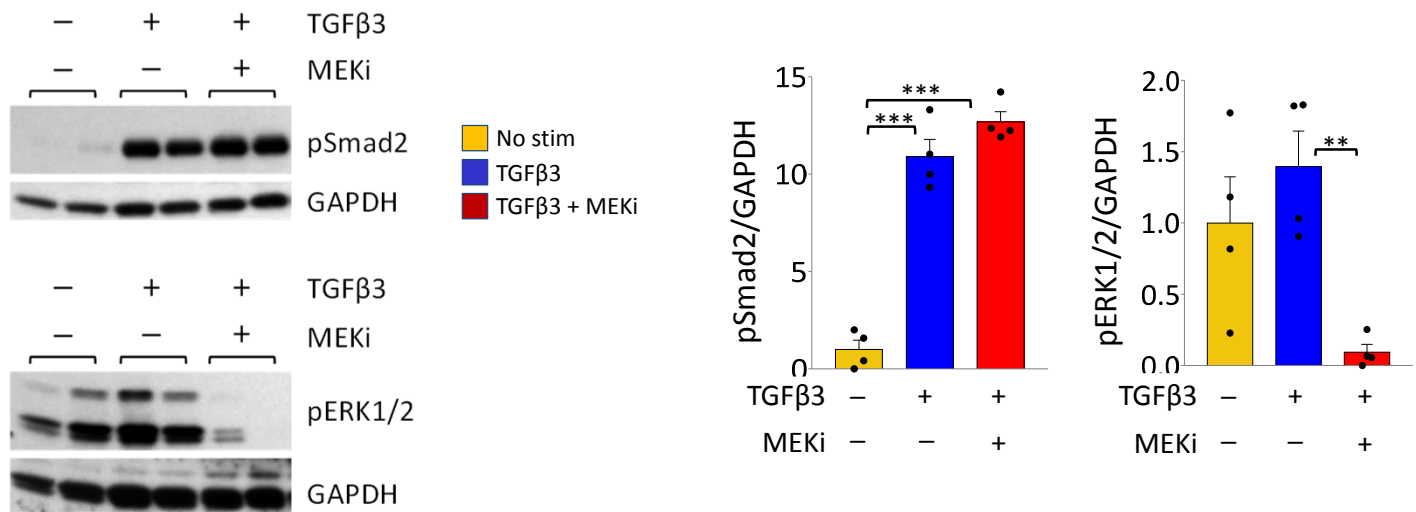

Supplemental Figure 6. *ERK1/2* activation, but not *Smad2* activation, is significantly attenuated by MEK inhibition. Immunoblot for pSmad2, pERK1/2 and GAPDH using cultured neonatal rat cardiac fibroblasts with TGF-β3 (10 ng/ml) stimulation for 15 minutes with and without treatment with MEKi, RDEA119 (100nM) or PD98059 (50μM). n=4 per group. \*\*p<0.01, \*\*\*p<0.001, 1w ANOVA, Tukey's correction.

# Supplemental Figure 7

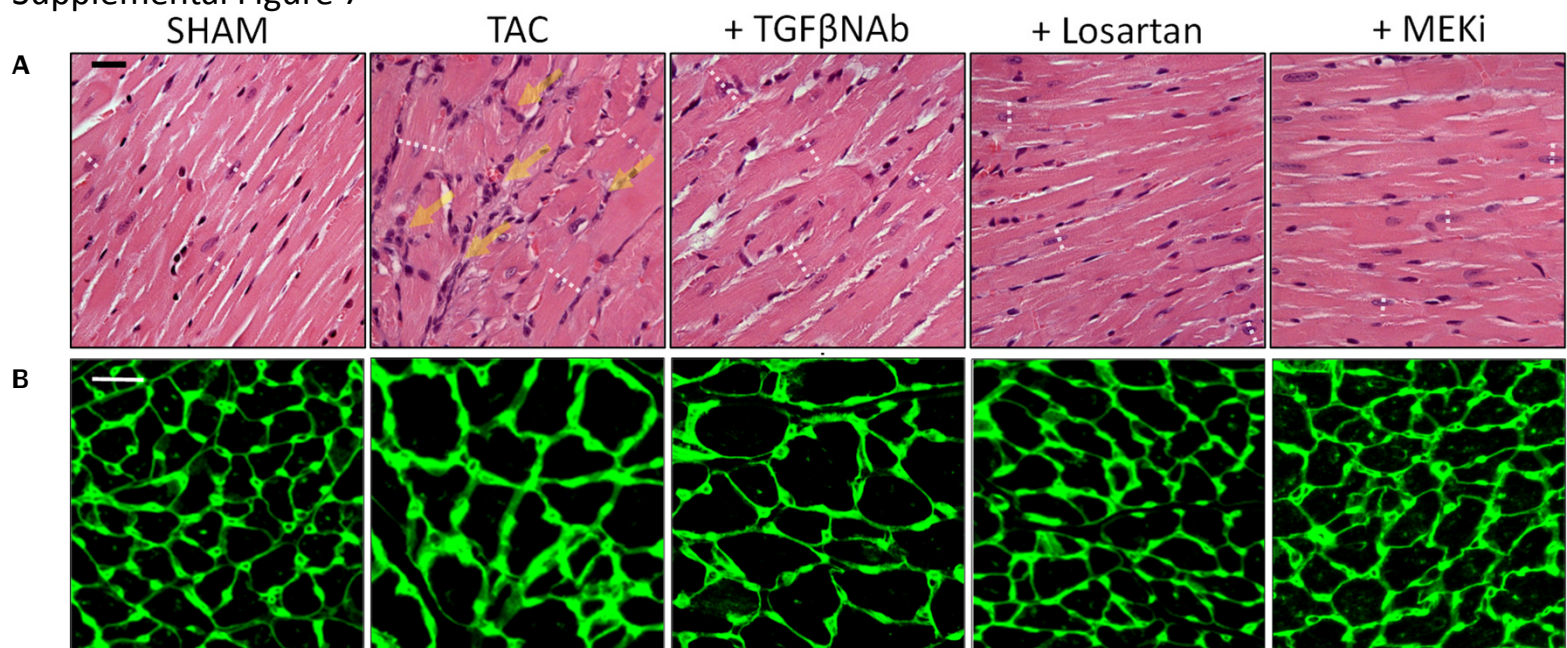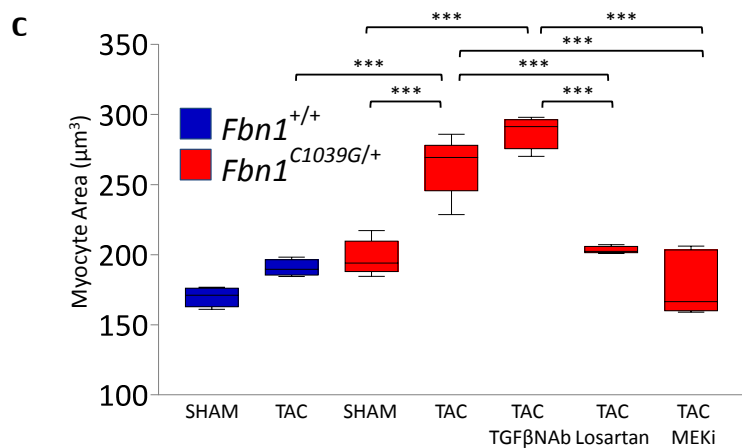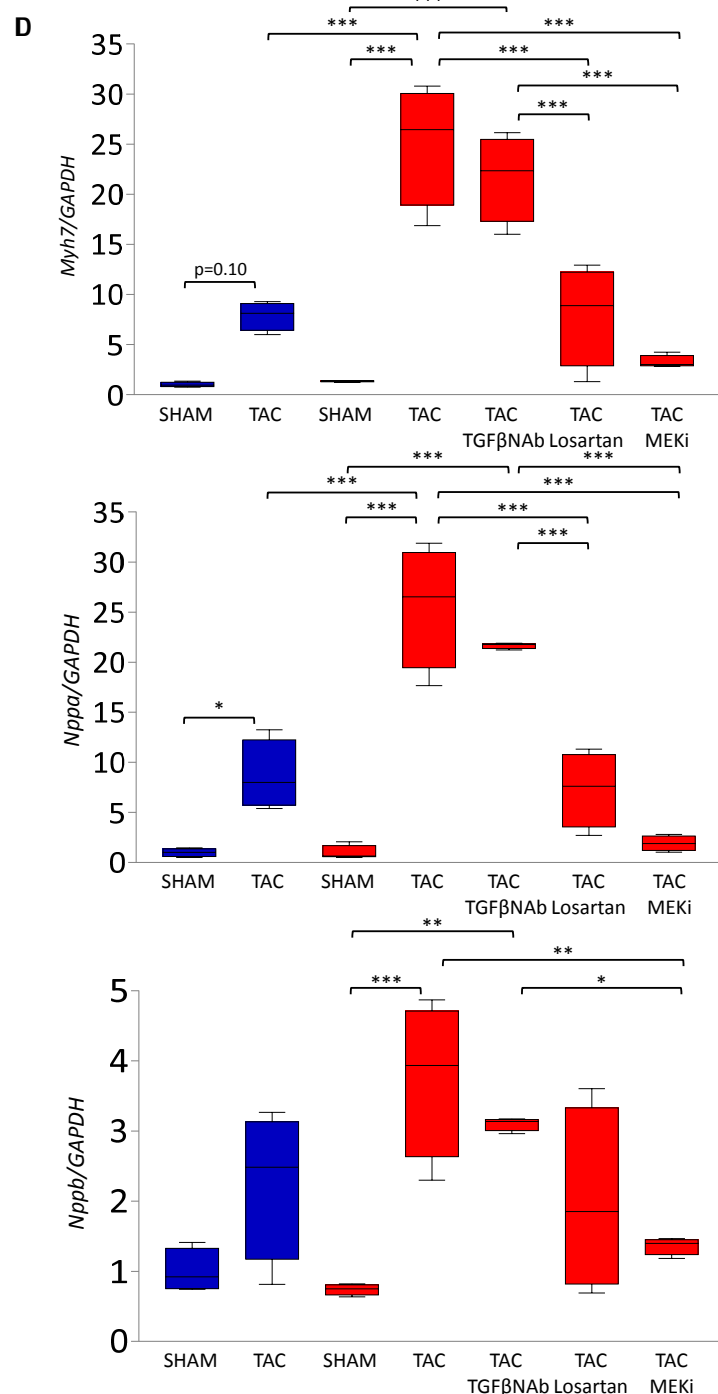

Supplemental Figure 7. Myocyte hypertrophy in *Fbn1*<sup>C1039G/+</sup> hearts is prevented with losartan and MEKi treatment. **A**. Representative hematoxylin-eosin staining of formalin-fixed heart sections. White dotted line delineates myocyte diameter. Scale bars: 50 μm. **B**. Myocyte hypertrophy as assessed by wheat germ agglutinin (WGA) staining. Scale bars: 25 μm. **C**. Summary quantification of average cross-sectional area (CSA) data, >1000 cells per heart. n=4-7 per group. **D**. mRNA expression of hypertrophy genes, normalized to *Gapdh* and then to *Fbn1*<sup>+/+</sup>:SHAM data, assessed by real-time RT-PCR. *Myh7*, myosin heavy chain 7 (βMHC), *Myh6*, myosin heavy chain 6 (αMHC), *Nppa*, natriuretic peptide A (ANP), *Nppb*, natriuretic peptide B (BNP). n=4-7 per group. \*p<0.05, \*\*p<0.01, \*\*\*p<0.001, 1w ANOVA, Tukey's correction.

## Supplemental Figure 8

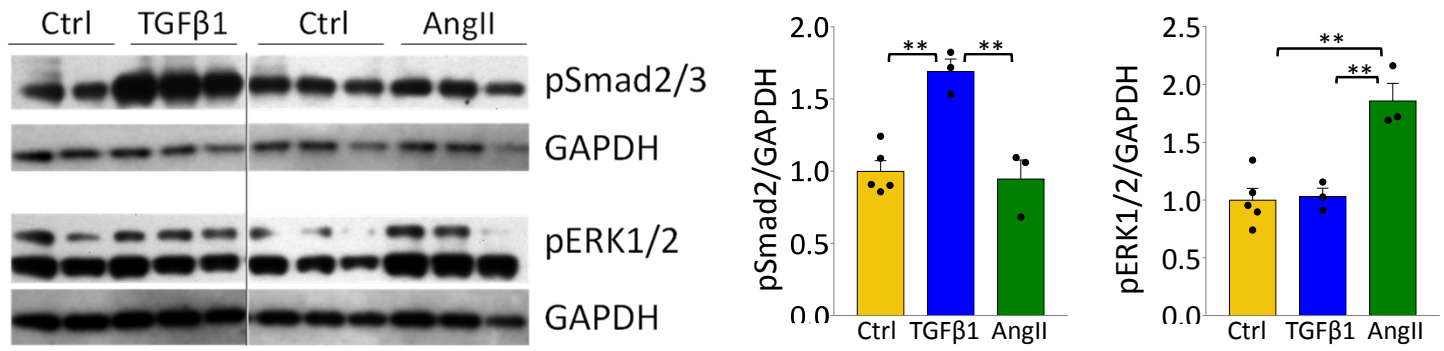

Supplemental Figure 8. *Smad2* and *ERK1/2* activation are differentially increased in response to *TGFβ* and angiotensin II in cardiac fibroblasts. Immunoblot for pSmad2, pERK1/2 and GAPDH using cultured neonatal murine cardiac fibroblasts with TGFβ1 (5 ng/ml) or AngII (5nM) stimulation for 24 hours. Lanes were run on the same gel but were noncontiguous. n>=3 per group. \*\*p<0.01, 1w ANOVA, Tukey's correction.

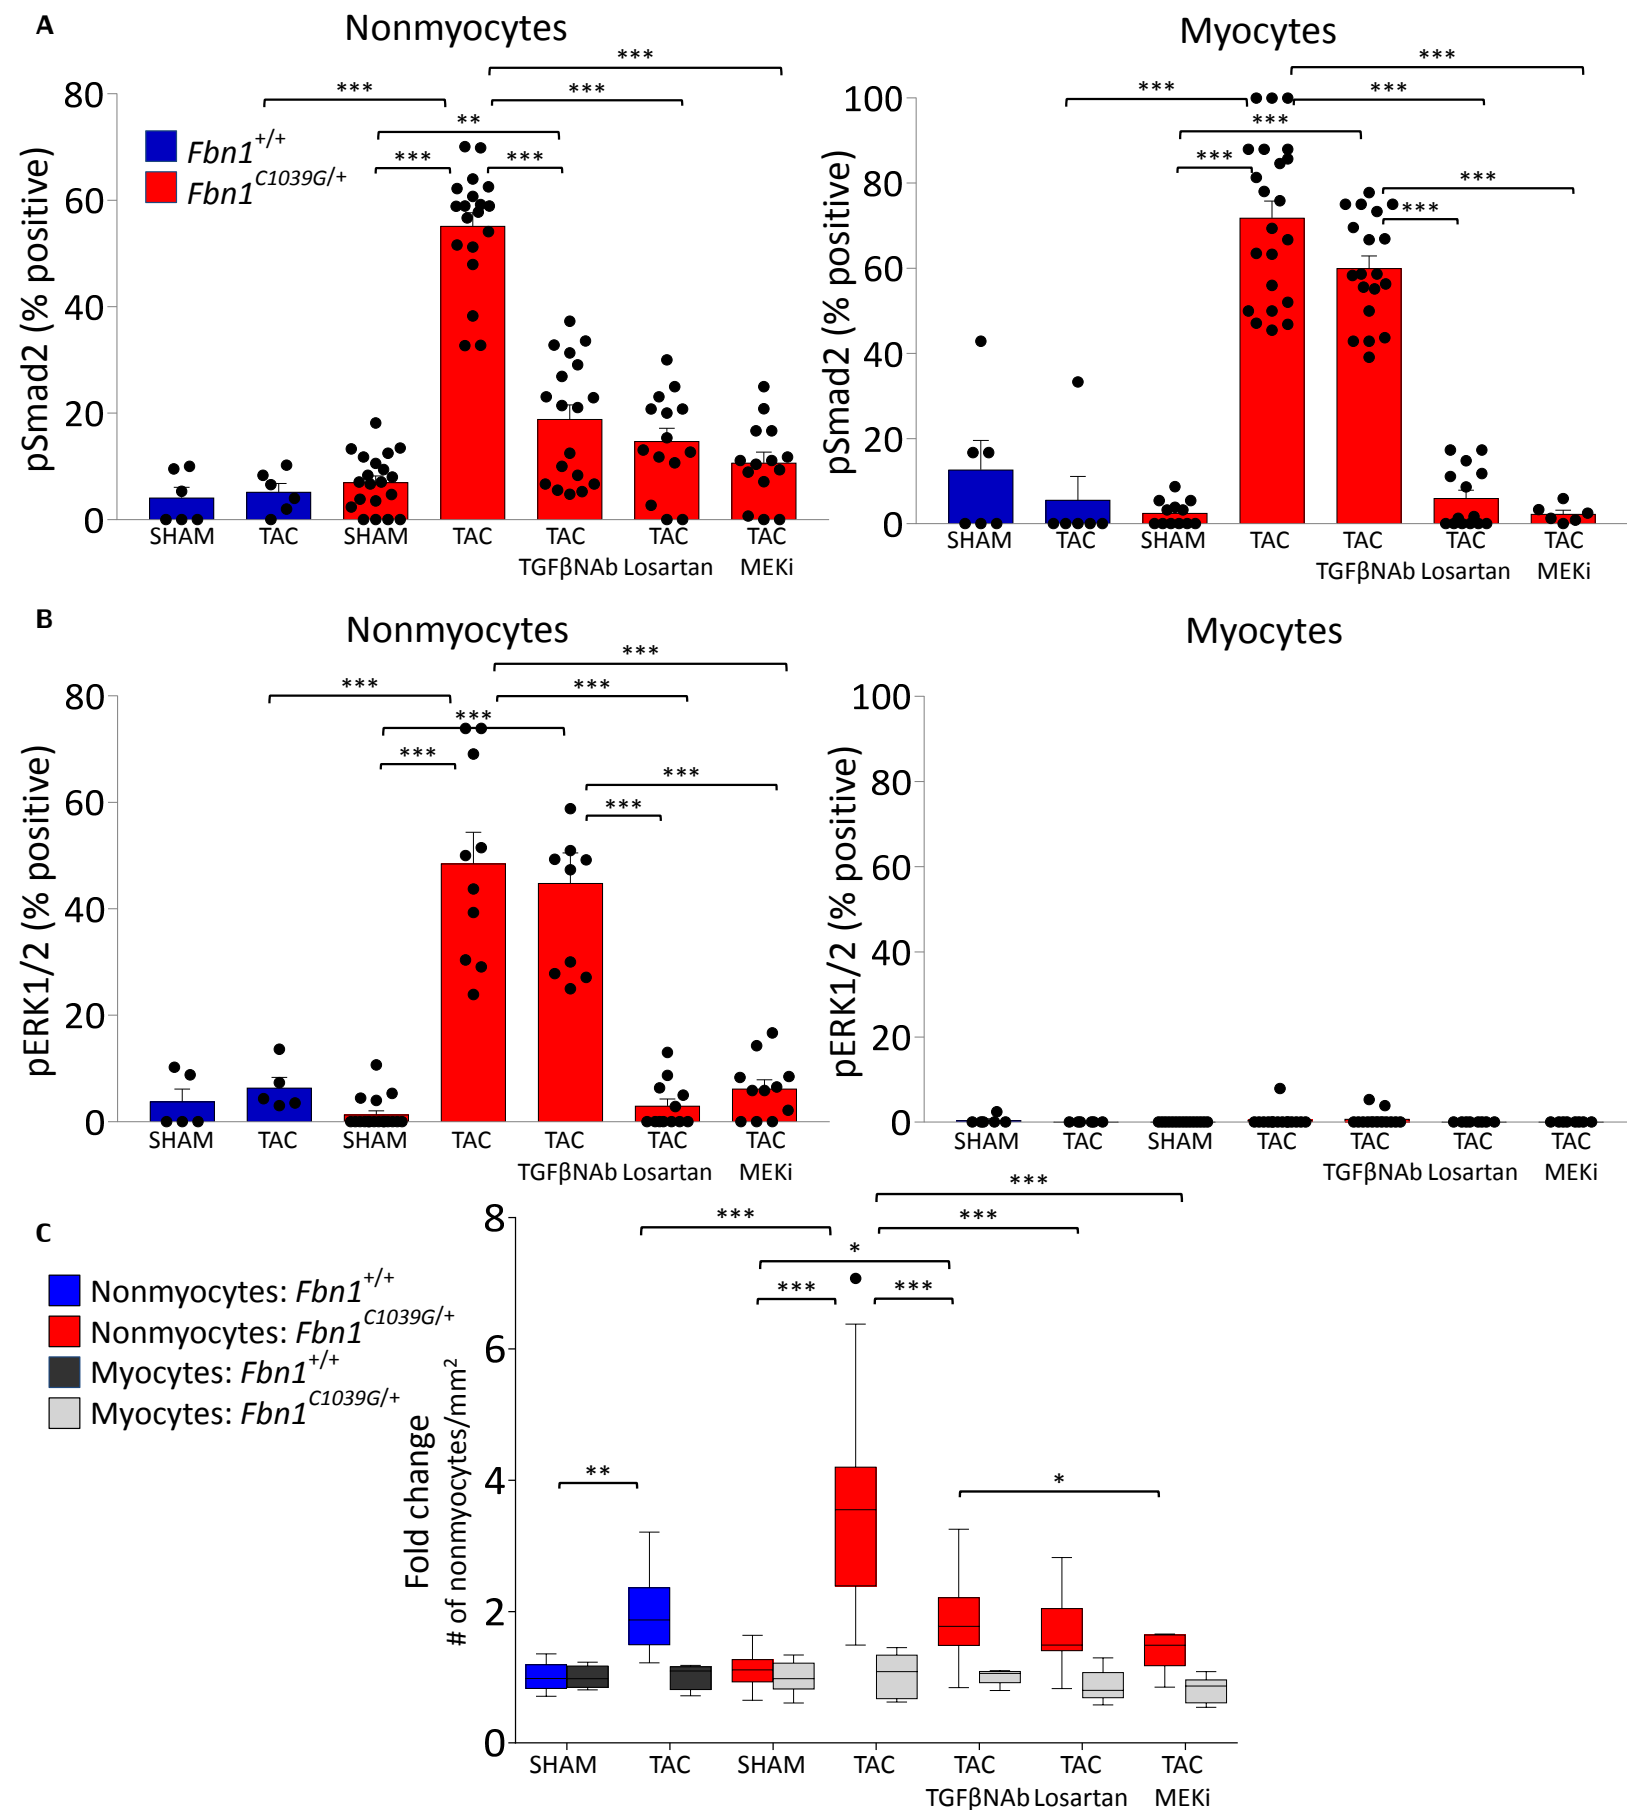

Supplemental Figure 9. Inhibition of ERK1/2 activation suppresses Smad2 activation in both nonmyocyte and myocyte compartments. A-B. Labeling index (% positive cells) of pSmad2 or pERK1/2 immunofluorescence in the nonmyocyte and myocyte compartments. n>5 fields per group. C. Total number of nonmyocytes and myocytes normalized to *Fbn1*<sup>+/+</sup>:SHAM data. n=15-30 fields per group. \*p<0.05, \*\*p<0.01, \*\*\*p<0.001, 1w ANOVA, Tukey's correction.

Supplemental Figure 10

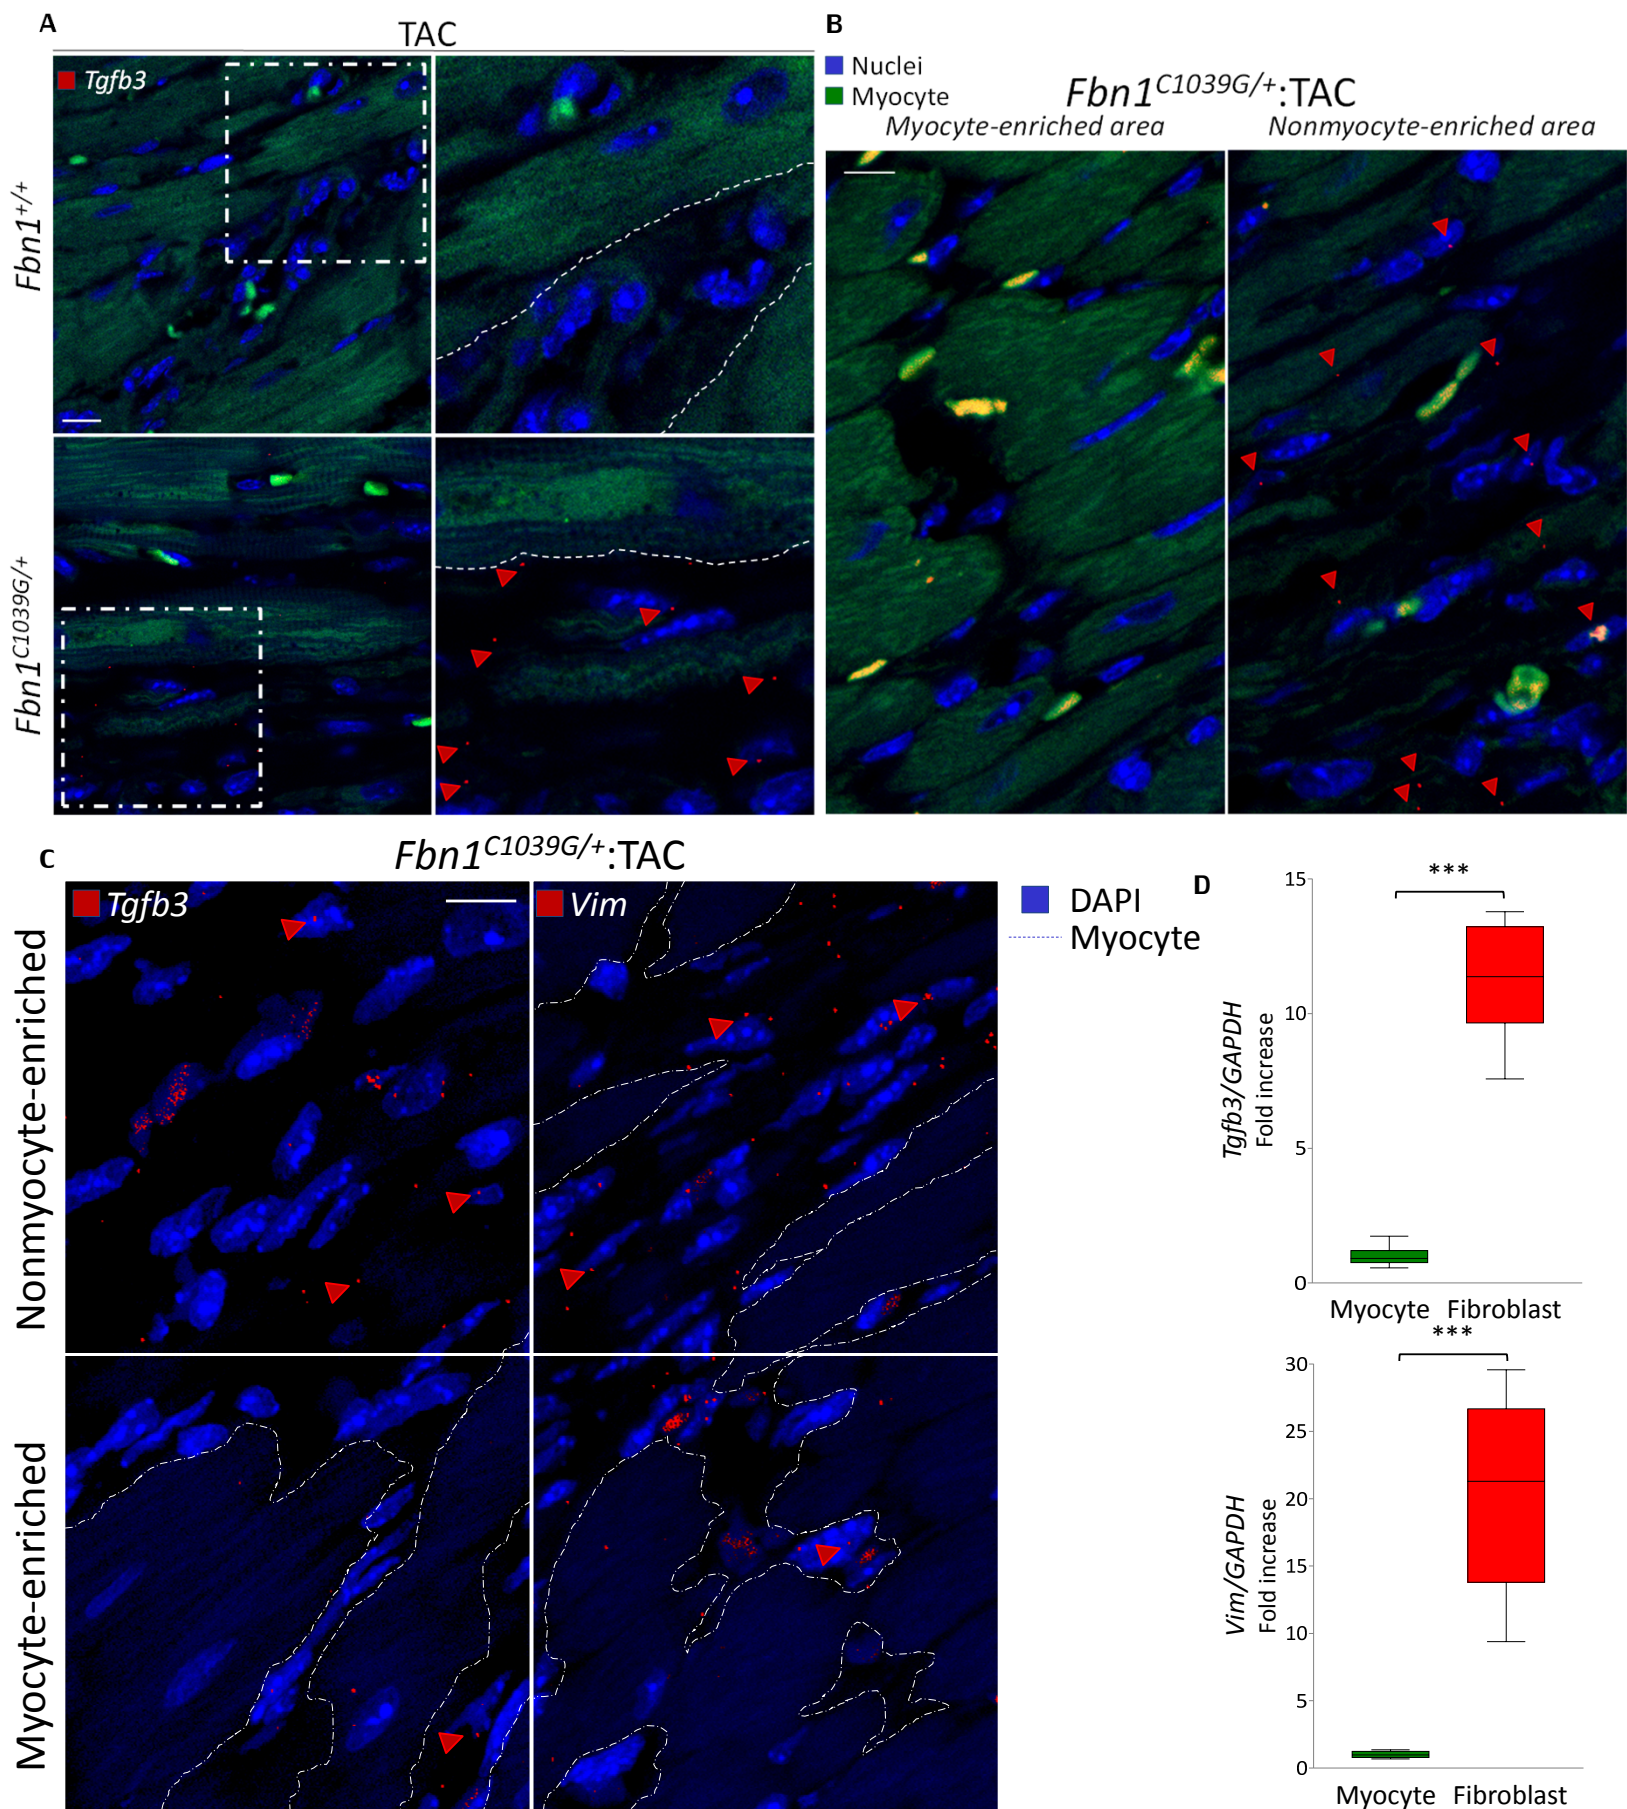

Supplemental Figure 10. *TGFβ3* is predominantly expressed in the nonmyocyte compartment. A-C. Representative *in situ* hybridization of *Tgfb3*. A. *Fbn1*<sup>+/+</sup>:TAC vs *Fbn1*<sup>C1039G/+</sup>:TAC, *Tgfb3*, red. Left panel, scale bar: 10μm. Right panel, zoom 2x inset. Dotted line demarcates myocyte compartment. Red arrows point to examples of *in situ* RNA hybridization (red dots) found throughout the nonmyocyte compartment. B. Myocyte- vs nonmyocyte-enriched areas. Scale bar: 10μm. C. *Tgfb3* and *Vim*. Left panel, *Tgfb3*, red, left panel and *Vim*, red, right panel. Dotted-line outlines the cardiac myocytes. Scale bar: 10μm. D. mRNA expression of *Tgfb3* and *Vim* normalized to *Gapdh* and then to myocyte data. n=4-6 per group. \*\*\*p<0.001, Student's t-test.

Supplemental Figure 11

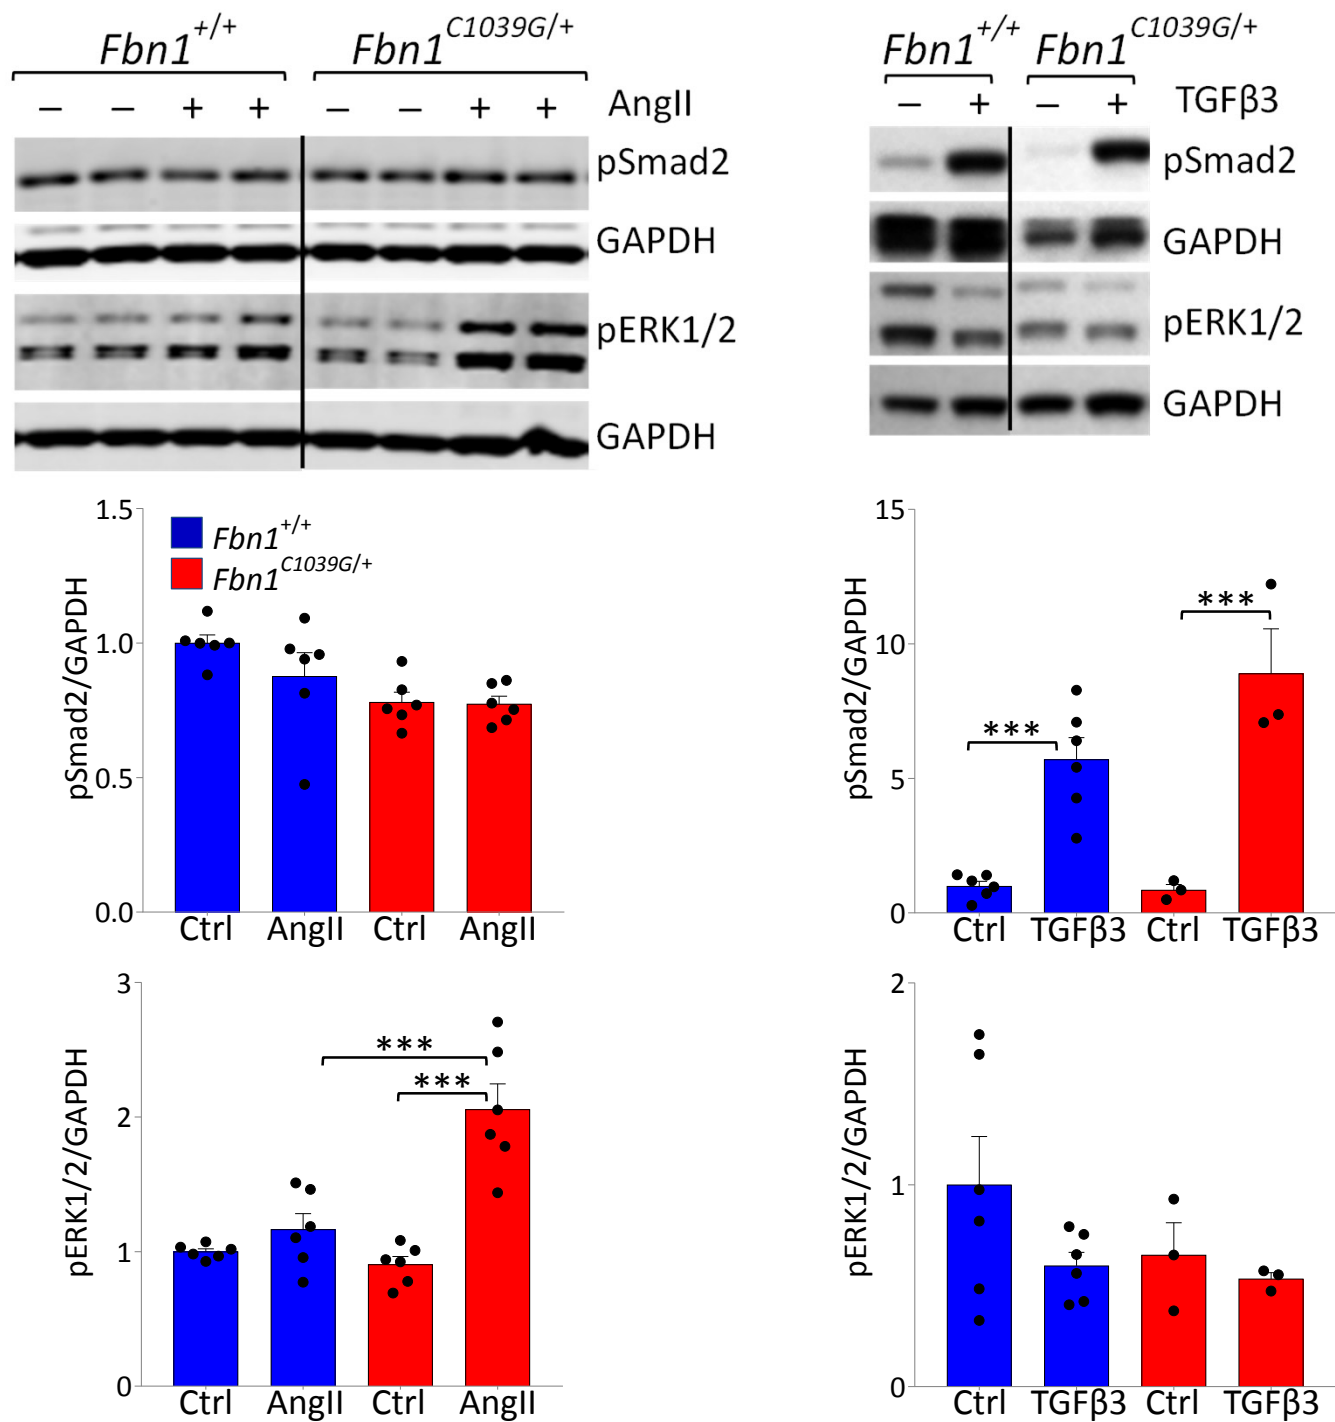

Supplemental Figure 11. *AngII-mediated ERK1/2 activation is differentially increased in  $Fbn1^{C1039G/+}$  vs WT fibroblasts.* Immunoblots for pSmad2, pERK1/2 and GAPDH using cultured neonatal murine cardiac fibroblasts from  $Fbn1^{C1039G/+}$  and  $Fbn1^{+/+}$  hearts with AngII (5nM) or TGFβ3 (5 ng/ml) stimulation for 12 hours. Lanes were run on the same gel but were noncontiguous. n>=3 per group. \*\*\*p<0.001, 1w ANOVA, Tukey's correction.
